# Supplementary material for: Core/Shell Nitrogen-Doped TiO2@SiO2 Nano-Catalyst as an Additive in Photocatalytic Paint for Gaseous Acetaldehyde Decomposition
Source: MDPI journal article supplement (doi:10.3390/catal13020351), 2023-02-04
Supplement: s1 [file s1]

## Supplementary

# Core/shell nitrogen-doped $\text{TiO}_2@\text{SiO}_2$ nano-catalyst as an additive in photocatalytic paint for gaseous acetaldehyde decomposition

Suwapee Samangsri<sup>1,2</sup>, Thanita Areerob<sup>3</sup> and Siriluk Chiarakorn<sup>4,5,\*</sup>

<sup>1</sup> The Joint Graduate School of Energy and Environment, King Mongkut's University of Technology Thonburi, Bangkok 10140, Thailand

<sup>2</sup> Center of Excellence on Energy Technology and Environment, PERDO, Bangkok 10140, Thailand

<sup>3</sup> Marine Environmental and Geoinformatics Technology Research Unit, Faculty of Technology and Environment, Prince of Songkla University Phuket Campus, Phuket 83120, Thailand

<sup>4</sup> Environmental Technology Program, School of Energy, Environment and Materials, King Mongkut's University of Technology Thonburi, Bangkok 10140, Thailand

<sup>5</sup> Environmental and Energy Management for Community and Circular Economy (EEC&C) Research Group, King Mongkut's University of Technology Thonburi, Bangkok 10140, Thailand

\* Correspondence: siriluk.chi@kmutt.ac.th; Tel: +66-2470-8654

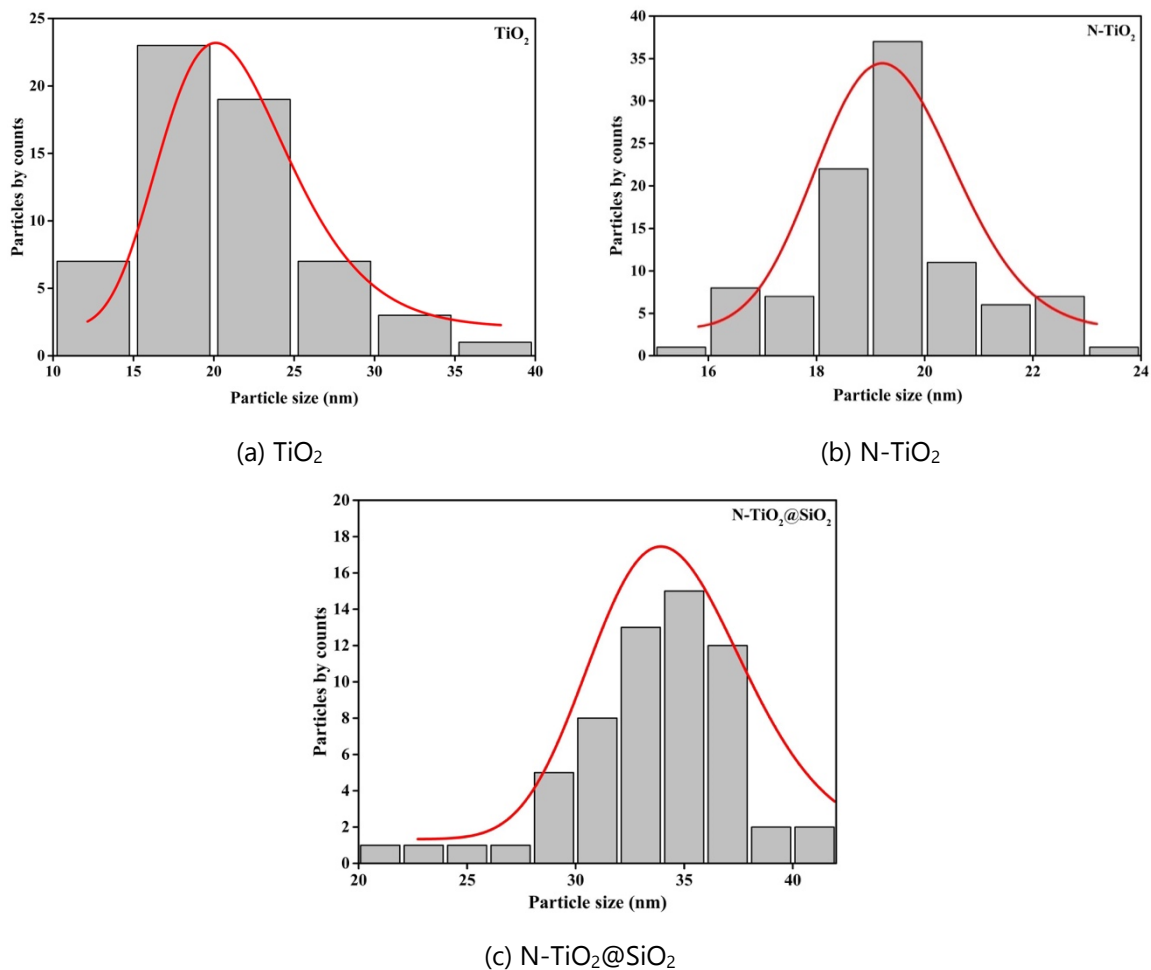

**Figure 1.** The particle size distributions of (a)  $\text{TiO}_2$ , (b)  $\text{N-TiO}_2$ , and (c)  $\text{N-TiO}_2@\text{SiO}_2$ .

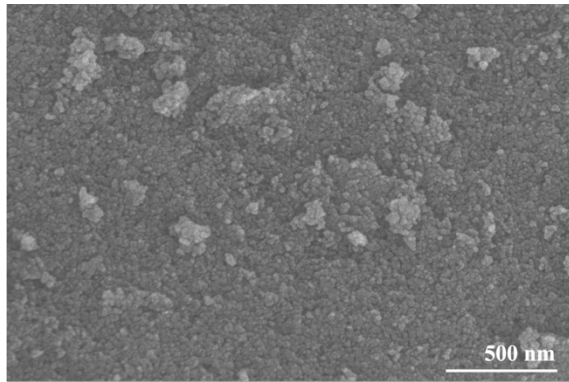

(a)  $\text{TiO}_2$

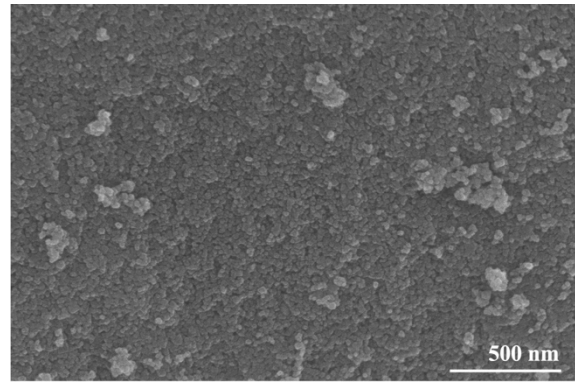

(b)  $\text{N-TiO}_2$

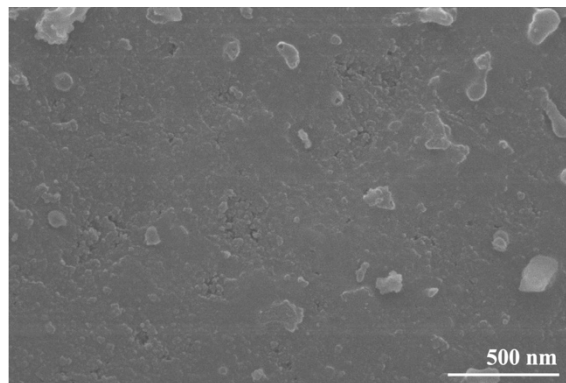

(c)  $\text{N-TiO}_2@\text{SiO}_2$

**Figure 2.** SEM images of (a)  $\text{TiO}_2$ , (b)  $\text{N-TiO}_2$ , and (c)  $\text{N-TiO}_2@\text{SiO}_2$ .

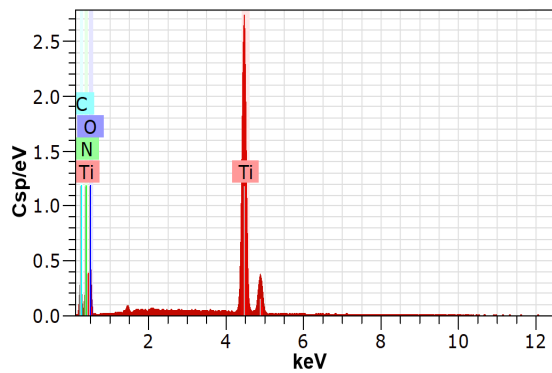

(a)  $\text{N-TiO}_2$

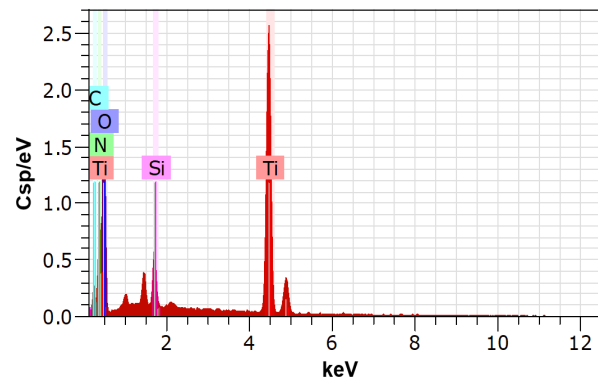

(b)  $\text{N-TiO}_2@\text{SiO}_2$  core/shell

**Figure 3.** The EDX spectrum of (a)  $\text{N-TiO}_2$  and (b)  $\text{N-TiO}_2@\text{SiO}_2$  core/shell.
